# Supplementary material for: Effect of hydrothermal pretreatment on the structural changes of alkaline ethanol lignin from wheat straw
Source: PubMed Central journal article supplement (PMC5159836; doi:10.1038/srep39354), 2016-12-16
Supplement: srep39354-s1.pdf [file srep39354-s1.pdf]

## Supporting Information

### **Effect of hydrothermal pretreatment on the structural changes of alkaline ethanol lignin from wheat straw**

Xue Chen, Hanyin Li, Shaoni Sun, Xuefei Cao\* & Runcang Sun\*

Beijing Key Laboratory of Lignocellulosic Chemistry, Beijing Forestry University, Beijing

100083, China

\*Authors to whom correspondence should be addressed.

E-mail: rcsun3@bjfu.edu.cn (Runcang Sun) or caoxuefei@bjfu.edu.cn (Xuefei Cao). Tel.:

+86-010-62336903; Fax: +86-010-62336903.

**Table S1**

The assignment and quantification of the signals of the  $^{13}\text{C}$ -NMR spectra (results expressed per Ar) of the lignin fractions.

| $\delta$ (ppm) | Assignment             | AL   | L <sub>120</sub> | L <sub>160</sub> | L <sub>200</sub> |
|----------------|------------------------|------|------------------|------------------|------------------|
| 158-140        | Aromatic C-O           | 1.79 | 1.87             | 1.85             | 1.74             |
| 140-124        | Aromatic C-C           | 1.54 | 1.59             | 1.64             | 1.92             |
| 124-102        | Aromatic C-H           | 2.66 | 2.54             | 2.51             | 2.34             |
| 62-58.1        | $\beta$ -O-4' linkages | 0.99 | 0.60             | 0.38             | 0.26             |
| 58.1-54.5      | -OCH <sub>3</sub>      | 1.60 | 1.56             | 1.37             | 1.26             |

**Table S2**Assignments of  $^{13}\text{C}$ - $^1\text{H}$  cross-peaks in HSQC spectra of the lignins.

| Lable                          | $\delta_{\text{C}}/\delta_{\text{H}}$ (ppm) | Assignments                                                                                   |
|--------------------------------|---------------------------------------------|-----------------------------------------------------------------------------------------------|
| $\text{C}_{\beta}$             | 53.5/3.45                                   | $\text{C}_{\beta}$ - $\text{H}_{\beta}$ in phenylcoumaran substructures (C)                   |
| $\text{B}_{\beta}$             | 53.6/3.06                                   | $\text{C}_{\beta}$ - $\text{H}_{\beta}$ in $\beta$ - $\beta'$ (resinol) substructures (B)     |
| $-\text{OCH}_3$                | 55.5/3.70                                   | C-H in methoxyls                                                                              |
| $\text{A}_{\gamma}$            | 59.6/3.61                                   | $\text{C}_{\gamma}$ - $\text{H}_{\gamma}$ in $\beta$ - $\text{O}$ -4' substructures (A)       |
| $\text{E}_{\gamma}$            | 61.2/4.09                                   | $\text{C}_{\gamma}$ - $\text{H}_{\gamma}$ in <i>p</i> -hydroxycinnamyl alcohol end groups (F) |
| $\text{C}_{\gamma}$            | 62.2/3.70                                   | $\text{C}_{\gamma}$ - $\text{H}_{\gamma}$ in phenylcoumaran substructures (C)                 |
| $\text{B}_{\gamma}$            | 71.0/3.79-4.16                              | $\text{C}_{\gamma}$ - $\text{H}_{\gamma}$ in $\beta$ - $\beta'$ (resinol) substructures (B)   |
| $\text{A}_{\alpha}$            | 71.7/4.82                                   | $\text{C}_{\alpha}$ - $\text{H}_{\alpha}$ in $\beta$ - $\text{O}$ -4' units (A)               |
| $\text{D}_{\alpha}$            | 79.3/5.58                                   | $\text{C}_{\alpha}$ - $\text{H}_{\alpha}$ in $\alpha$ , $\beta$ -diaryl ethers (E)            |
| $\text{A}_{\beta(\text{G/H})}$ | 83.7/4.28                                   | $\text{C}_{\beta}$ - $\text{H}_{\beta}$ in $\beta$ - $\text{O}$ -4' linked to a G/H unit (A)  |
| $\text{B}_{\alpha}$            | 84.8/4.64                                   | $\text{C}_{\alpha}$ - $\text{H}_{\alpha}$ in $\beta$ - $\beta'$ (resinol) substructures (B)   |
| $\text{A}_{\beta(\text{S})}$   | 85.8/4.09                                   | $\text{C}_{\beta}$ - $\text{H}_{\beta}$ in $\beta$ - $\text{O}$ -4' linked to an S unit (A)   |
| $\text{C}_{\alpha}$            | 87.4/5.58                                   | $\text{C}_{\alpha}$ - $\text{H}_{\alpha}$ in phenylcoumaran substructures (C)                 |
| $\text{S}_{2,6}$               | 104.0/6.69                                  | $\text{C}_{2,6}$ - $\text{H}_{2,6}$ in syringyl units (S)                                     |
| $\text{S}'_{2,6}$              | 104.1/7.31                                  | $\text{C}_{2,6}$ - $\text{H}_{2,6}$ in oxidized ( $\text{C}_{\alpha}=\text{O}$ ) S units (S') |
| $\text{G}_2$                   | 111.0/6.97                                  | $\text{C}_2$ - $\text{H}_2$ in guaiacyl units (G)                                             |
| $\text{G}_5$                   | 114.6/6.71                                  | $\text{C}_5$ - $\text{H}_5$ in guaiacyl units (G)                                             |
| $\text{G}_6$                   | 118.9/6.77                                  | $\text{C}_6$ - $\text{H}_6$ in guaiacyl units (G)                                             |
| $\text{H}_{2,6}$               | 128.3/7.21                                  | $\text{C}_{2,6}$ - $\text{H}_{2,6}$ in H units (H)                                            |
| $\text{PCA}_{3,5}$             | 115.4/6.81                                  | $\text{C}_{3,5}$ - $\text{H}_{3,5}$ in <i>p</i> -coumaric acid (PCA)                          |
| $\text{PCA}_{2,6}$             | 129.7/7.50                                  | $\text{C}_{2,6}$ - $\text{H}_{2,6}$ in <i>p</i> -coumaric acid (PCA)                          |
| $\text{PCA}_7$                 | 144.0/7.48                                  | $\text{C}_7$ - $\text{H}_7$ in <i>p</i> -coumaric acid (PCA)                                  |
| $\text{PCA}_8$                 | 115.1/6.30                                  | $\text{C}_8$ - $\text{H}_8$ in <i>p</i> -coumaric acid (PCA)                                  |
| $\text{FA}_2$                  | 111.0/7.26                                  | $\text{C}_2$ - $\text{H}_2$ in ferulic acid (FA)                                              |
| $\text{FA}_6$                  | 122.1/7.08                                  | $\text{C}_6$ - $\text{H}_6$ in ferulic acid (FA)                                              |
| $\text{FA}_7$                  | 144.0/7.48                                  | $\text{C}_7$ - $\text{H}_7$ in ferulic acid (FA)                                              |
| $\text{FA}_8$                  | 116.5/6.40                                  | $\text{C}_8$ - $\text{H}_8$ in ferulic acid (FA)                                              |

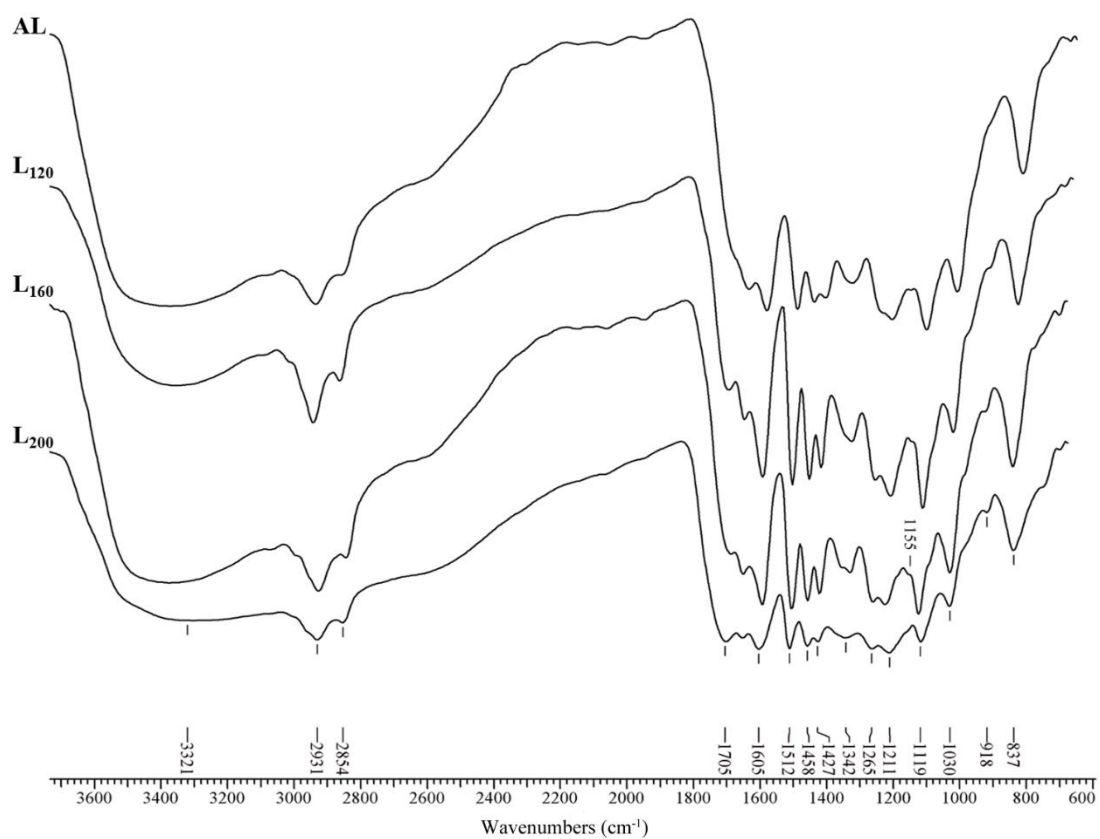

**Fig. S1.** FT-IR spectra of the lignins.

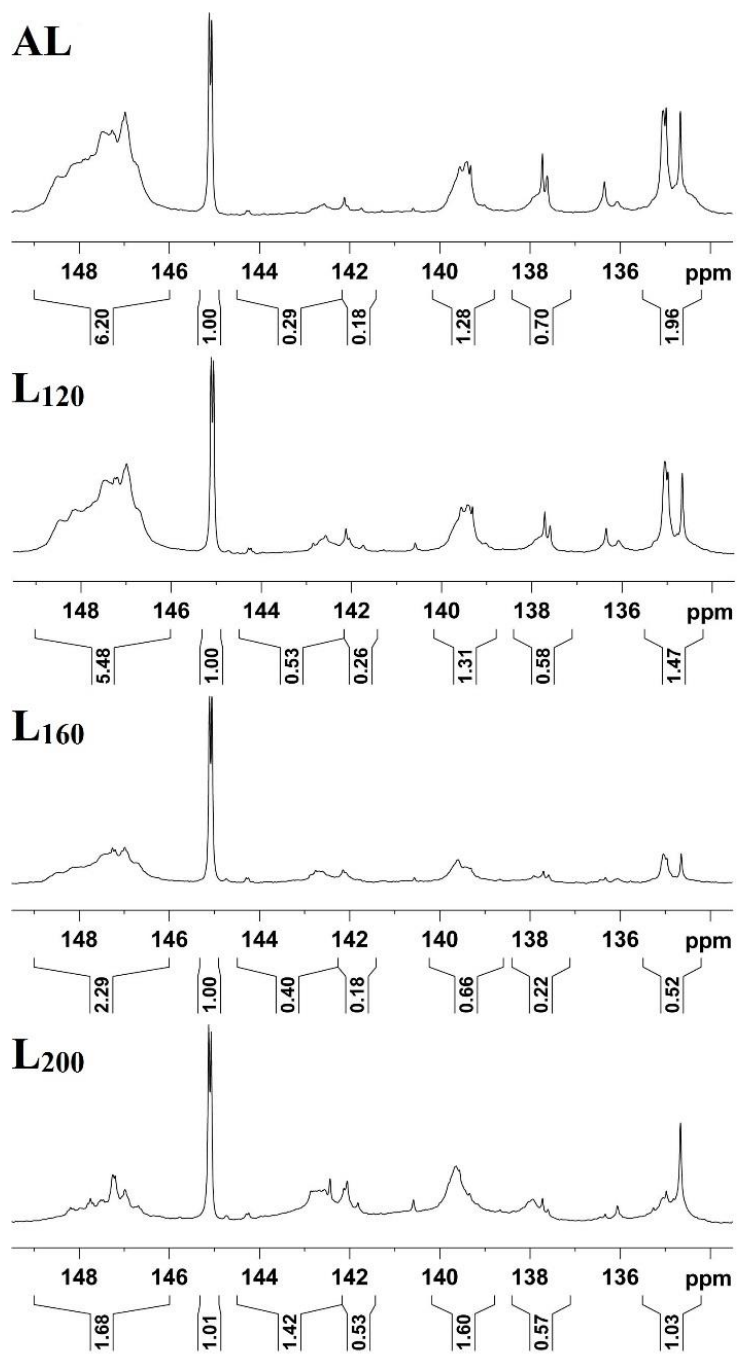

**Fig. S2.**  $^{31}\text{P}$ -NMR spectra of the lignins.
